# Supplementary material for: Paraoxonase 1 Phenotype and Protein N-Homocysteinylation in Patients with Rheumatoid Arthritis: Implications for Cardiovascular Disease
Source: PubMed Central journal article supplement (PMC7555791; doi:10.3390/antiox9090899), 2020-09-21
Supplement: antioxidants-09-00899-s001.pdf [file antioxidants-09-00899-s001.pdf]

**Table S1. PON1 polymorphism**

| <b>Phenotype (genotype)</b> | <b>Control (n=70)</b> | <b>RA (n=74)</b> |
|-----------------------------|-----------------------|------------------|
| QQ                          | 37                    | 39               |
| QR                          | 31                    | 29               |
| RR                          | 2                     | 6                |

**Table S2.** Specific PON1 activities.

|                                                                                | <b>Control (n=70)</b> | <b>RA (n=74)</b>  |
|--------------------------------------------------------------------------------|-----------------------|-------------------|
| Phenyl acetate (U/ $\mu\text{g}$ )                                             | 4.71 $\pm$ 1.04       | 3.41 $\pm$ 0.62*  |
| Paraoxon (U/ $\mu\text{g}$ )                                                   |                       |                   |
| QQ                                                                             | 5.72 $\pm$ 0.56       | 3.52 $\pm$ 0.47** |
| QR                                                                             | 7.85 $\pm$ 0.84       | 5.82 $\pm$ 1.03** |
| RR                                                                             | 10.2 $\pm$ 0.66       | 9.18 $\pm$ 0.53   |
| Hcy thiolactone (nmol $\times$ min <sup>-1</sup> $\times$ $\mu\text{g}^{-1}$ ) | 3.28 $\pm$ 0.66       | 2.37 $\pm$ 0.43** |

\*p<0.05, \*\*p<0.01 vs. control group

**Table S3.** PON1 status, Hcy and Hcy thiolactone in healthy subjects and RA patients (eGFR>90 ml/min).

|                                                                                     | Control (n=54) | RA (n=50)     |
|-------------------------------------------------------------------------------------|----------------|---------------|
| PON1 polymorphism                                                                   |                |               |
| QQ                                                                                  | 29             | 27            |
| QR                                                                                  | 23             | 20            |
| RR                                                                                  | 2              | 3             |
| PON1 concentration (µg/ml)                                                          | 22.4 ± 3.1     | 20.6 ± 2.3    |
| PON1 activity toward phenyl acetate (U/ml)                                          | 122.3 ± 15.1   | 73.5 ± 12.3** |
| PON1 activity toward Hcy thiolactone (nmol × min <sup>-1</sup> × ml <sup>-1</sup> ) | 84.7 ± 11.2    | 50.6 ± 9.6*** |
| Total homocysteine (µM)                                                             | 7.98 ± 1.01    | 8.26 ± 1.3    |
| N-Hcy-protein (µM)                                                                  | 2.24 ± 0.82    | 2.66 ± 0.96*  |

\*p<0.05, \*\*p<0.01, \*\*\*p<0.001 vs. control group

**Table S4.** Serum lipids, PON1 status, Hcy and N-Hcy protein in healthy females according to menopausal status

|                                                                                        | <b>Before menopause<br/>(n=10)</b> | <b>After<br/>menopause<br/>(n=48)</b> |
|----------------------------------------------------------------------------------------|------------------------------------|---------------------------------------|
| Age                                                                                    | 43.4 ± 8.56                        | 58.8 ± 6.11***                        |
| Total cholesterol (mg/dl)                                                              | 184.0 ± 29.4                       | 220.4 ± 30.0*                         |
| LDL-cholesterol (mg/dl)                                                                | 108.6 ± 17.4                       | 129.2 ± 29.0                          |
| HDL-cholesterol (mg/dl)                                                                | 56.4 ± 12.5                        | 69.4 ± 15.8                           |
| Non-HDL cholesterol (mg/dl)                                                            | 127.6 ± 19.7                       | 150.9 ± 30.9                          |
| Triglycerides (mg/dl)                                                                  | 94.4 ± 35.3                        | 108.7 ± 39.3                          |
| PON1 concentration (µg/ml)                                                             | 20.7 ± 3.2                         | 21.6 ± 2.9                            |
| PON1 activity toward Hcy thiolactone<br>(nmol × min <sup>-1</sup> × ml <sup>-1</sup> ) | 89.7 ± 11.6                        | 85.4 ± 10.9                           |
| Total homocysteine (µM)                                                                | 7.11 ± 1.12                        | 7.44 ± 1.07                           |
| N-Hcy-protein (µM)                                                                     | 2.24 ± 0.82                        | 2.66 ± 0.96                           |

\*p<0.05, \*\*\*p<0.001 vs. premenopausal group

**Table S5.** Serum lipids, disease activity, PON1 status, Hcy and N-Hcy protein in females with RA according to menopausal status

|                                                                                        | <b>Before menopause<br/>(n=21)</b> | <b>After<br/>menopause<br/>(n=39)</b> |
|----------------------------------------------------------------------------------------|------------------------------------|---------------------------------------|
| Age                                                                                    | 39.4 ± 8.27                        | 60.3 ± 7.18***                        |
| Total cholesterol (mg/dl)                                                              | 197.8 ± 53.8                       | 185.5 ± 56.9                          |
| LDL-cholesterol (mg/dl)                                                                | 111.5 ± 36.0                       | 105.7 ± 31.9                          |
| HDL-cholesterol (mg/dl)                                                                | 66.3 ± 17.2                        | 56.9 ± 18.2                           |
| Non-HDL cholesterol (mg/dl)                                                            | 131.4 ± 52.2                       | 128.6 ± 35.0                          |
| Triglycerides (mg/dl)                                                                  | 100.0 ± 48.9                       | 114.7 ± 48.1                          |
| ESR (mm/1 h)                                                                           | 29.0 ± 19.4                        | 41.3 ± 26.5                           |
| CRP (mg/l)                                                                             | 13.4 ± 13.7                        | 37.4 ± 37.8**                         |
| DAS28-ESR                                                                              | 4.67 ± 1.36                        | 5.51 ± 1.88                           |
| PON1 concentration (µg/ml)                                                             | 23.7 ± 3.0                         | 21.8 ± 2.9                            |
| PON1 activity toward Hcy thiolactone<br>(nmol × min <sup>-1</sup> × ml <sup>-1</sup> ) | 54.6 ± 8.2                         | 50.5 ± 8.6                            |
| Total homocysteine (µM)                                                                | 7.25 ± 1.00                        | 8.56 ± 1.2*                           |
| N-Hcy-protein (µM)                                                                     | 2.59 ± 0.78                        | 2.73 ± 0.69                           |

\*p<0.05, \*\*p<0.01, \*\*\*p<0.001 vs. premenopausal group
